# Supplementary material for: Secondary leiomyosarcoma of the nasal cavity in a treated patient with possible hereditary retinoblastoma with germline reciprocal translocation of RB1 and DMXL1 and somatic TP53 mutation: A case report
Source: PubMed Central journal article supplement — Mol Clin Oncol. 2023 Jul 10;19(2):65. doi: 10.3892/mco.2023.2661 (PMC10407467; doi:10.3892/mco.2023.2661), 2023-07-10
Supplement: Supplementary_Data.pdf [file Supplementary_Data.pdf]

**Table SI.** Oligonucleotide sequences for validation of detected variants.

| <b>Target variants</b>           | <b>Oligonucleotide sequence (5'-3')</b> | <b>Amplicon size, base pairs</b> |
|----------------------------------|-----------------------------------------|----------------------------------|
| CDK6 Val62Gly                    | F: GAAGGTCTCCAGGTGCCTC                  | 174                              |
|                                  | R: GAATGCGTGGCGGAGATC                   |                                  |
| CDK12 Arg271Lys                  | F: GGGAGCTTCTTATGGCCAAG                 | 177                              |
|                                  | R: CTA CTGTAGGGGCTCGGTG                 |                                  |
| HGF Asp330Val                    | F: TCTACCTCATTTTCCCCAGGG                | 181                              |
|                                  | R: CCAAGGTCAAGGAGAAGGCT                 |                                  |
| KDM5A Thr134Ile                  | F: TCGTAGCCATATGTCTCTCGA                | 174                              |
|                                  | R: TGTCTTGCTGTTCATCTTGGA                |                                  |
| LRP1B Cys138Gly                  | F: GGTGCTCAAAGATGTCTGCT                 | 172                              |
|                                  | R: TGTCAGTATAAATGTACAATGGTCAGA          |                                  |
| MSH2 Met688Ile                   | F: ACATATATTCGACAAACTGGGGTG             | 170                              |
|                                  | R: GCAGTTTCCAACATTTAGCC                 |                                  |
| SNCAIP Glu87Lys                  | F: CCAGA ACTGTGCCGAAGATG                | 181                              |
|                                  | R: GGGTGGTGTGAGTGGAGAAG                 |                                  |
| TP53 splice acceptor of intron 8 | F: GGAGAGGAGCTGGTGTGTT                  | 194                              |
|                                  | R: GCGCACAGAGGAAGAGAATC                 |                                  |

F, forward primer; R, reverse primer.
